# Supplementary material
Source: PubMed Central journal article supplement (PMC4591752)

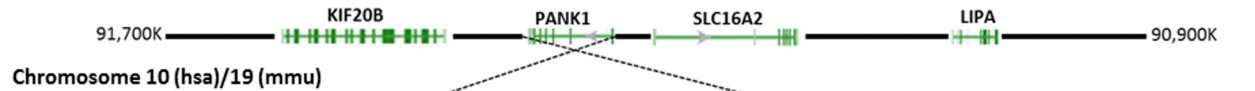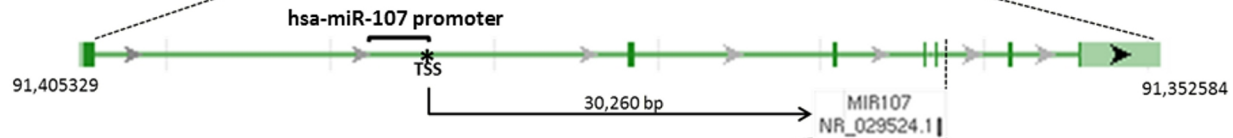

91,352584 91,352504

```

hsa --CUCUCUGCUUUCAGCUUCUUUACAGUGUUGCCUUGUGGCAUGGAGUUCAAGCAGCAUUGUACAGGGCUAUCAAAGCACAGA----
ptr --CUCUCUGCUUUCAGCUUCUUUACAGUGUUGCCUUGUGGCAUGGAGUUCAAGCAGCAUUGUACAGGGCUAUCAAAGCACAGA----
mm1 --CUCUCUGCUUUCAGCUUCUUUACAGUGUUGCCUUGUGGCAUGGAGUUCAAGCAGCAUUGUACAGGGCUAUCAAAGCACAGA----
bta --CUCUCUGCUUUCAGCUUCUUUACAGUGUUGCCUUGUGGCAUGGAGUUCAAGCAGCAUUGUACAGGGCUAUCAAAGCACAGA----
cfa -----AGCUUCUUUACAGUGUUGCCUUGUGGCAUGGAGUUCAAGCAGCAUUGUACAGGGCUAU-----
mmu UUCUCUGGCUUUCAGCUUCUUUACAGUGUUGCCUUGUGGCAUGGAGUUCAAGCAGCAUUGUACAGGGCUAUCAAAGCACAGAGAGC
rno UUCUCUGCUUUCAGCUUCUUUACAGUGUUGCCUUGUGGCAUGGAGUUCAAGCAGCAUUGUACAGGGCUAUCAAAGCACAGAGAGC
  
```

Mature sequence

hsa-miR-107 AGCAGCAUUGUACAGGGCUAUCA

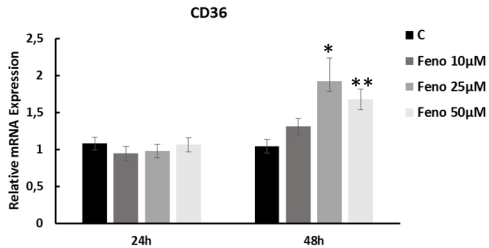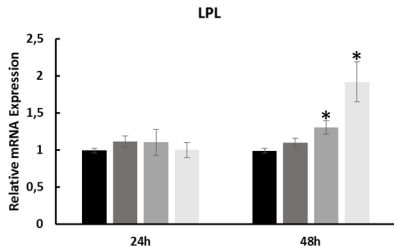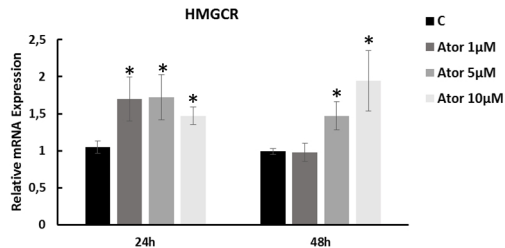

### anti-miR-107

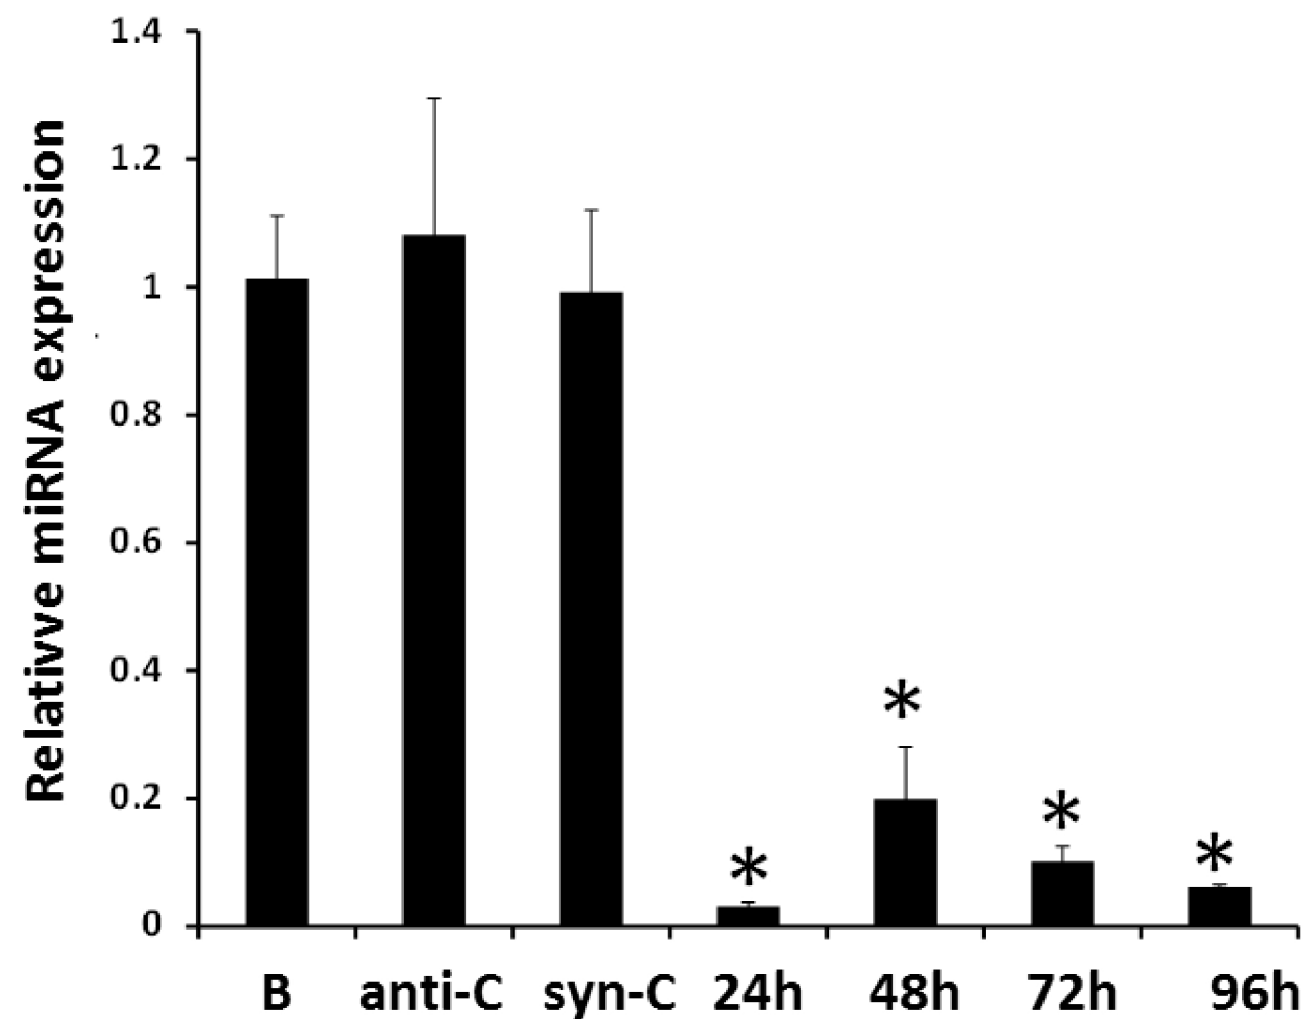

### syn-miR-107

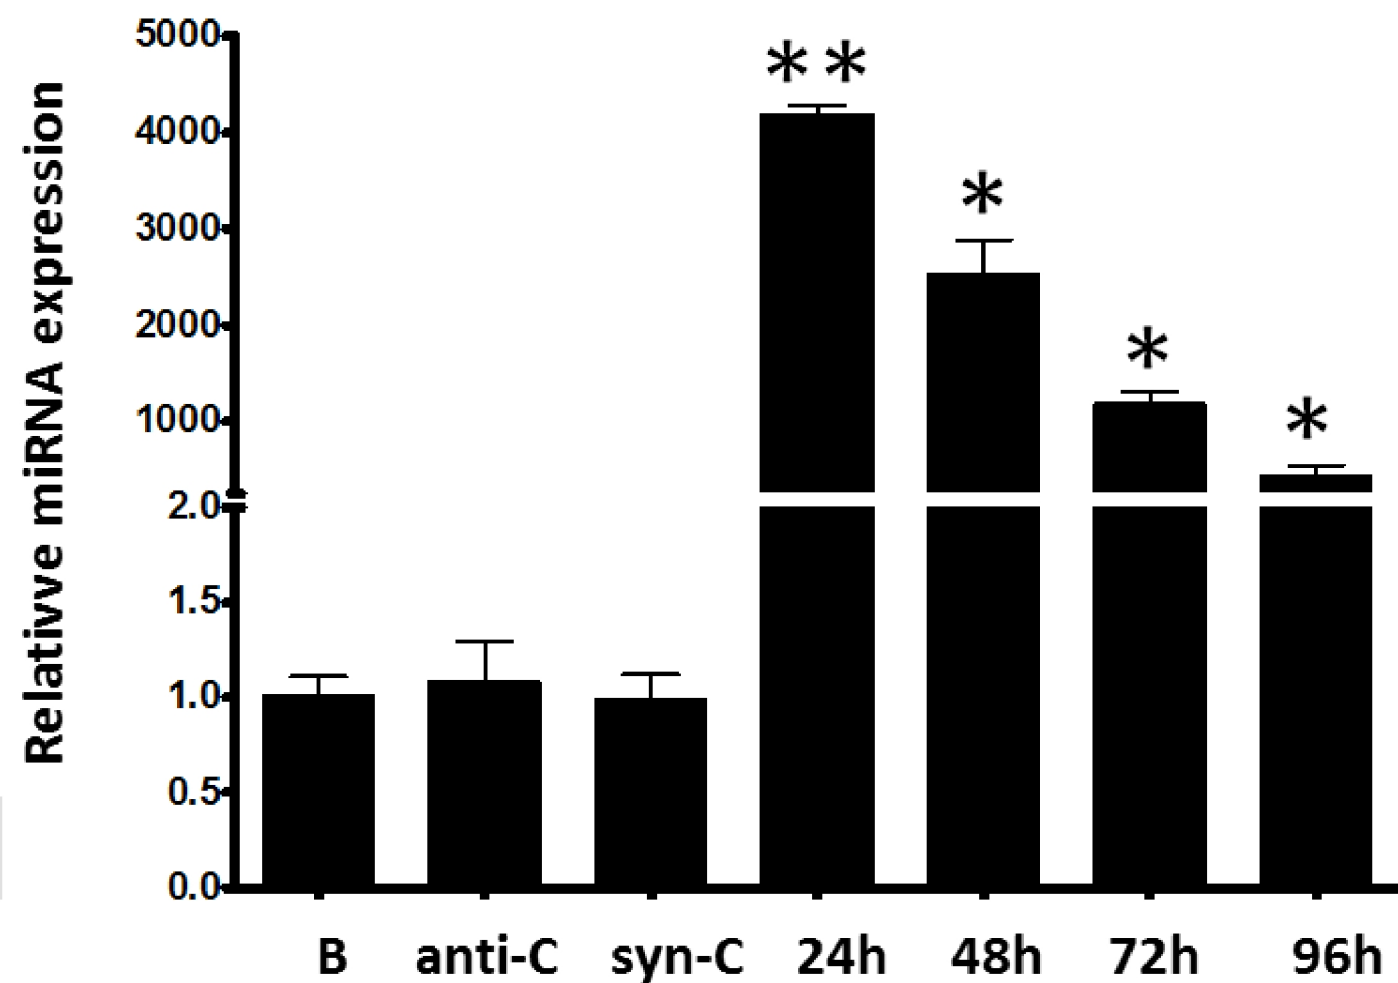

# DICER1

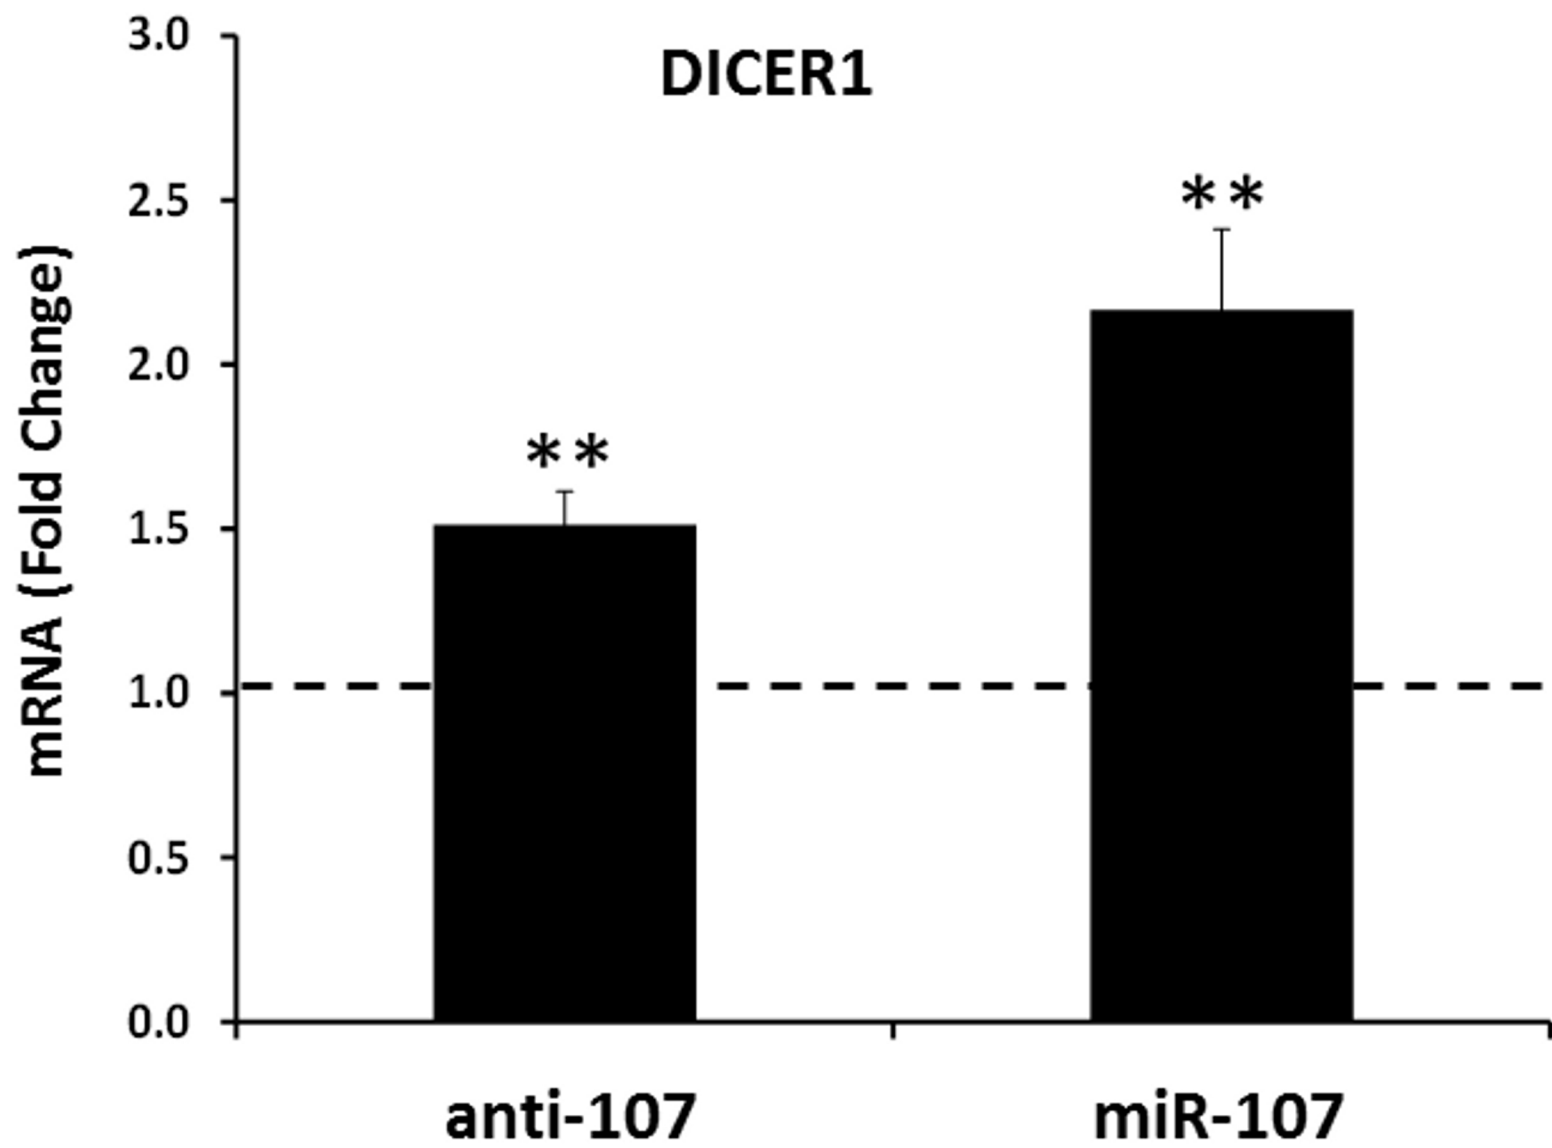

Supplement: NIHMS690634-supplement-Supp_FigureS1-S6___TableS1-S4.pdf [file NIHMS690634-supplement-Supp_FigureS1-S6___TableS1-S4.pdf]
